# Supplementary material for: Flat conjugated polymers combining a relatively low HOMO energy level and band gap: polyselenophenes versus polythiophenes
Source: Royal Society of Chemistry journal article supplement (doi:10.1039/c2jm31035j), 2012-01-01
Supplement: c2jm31035j.pdf [file c2jm31035j.pdf]

## Supporting Information

### Flat Conjugated Polymers Combining a Relatively Low HOMO Energy Level and Band Gap: Polyselenophenes versus Polythiophenes

Elena Poverenov,<sup>a,†</sup> Yana Sheynin,<sup>a</sup> Natalia Zamoshchik,<sup>a</sup> Asit Patra,<sup>a</sup> Gregory Leitius,<sup>b</sup> Igor  
F. Perepichka<sup>c</sup> and Michael Bendikov\*<sup>a</sup>

<sup>a</sup> Dr. E. Poverenov, Dr. Y. Sheynin, N. Zamoshchik, Dr. A. Patra, Prof. M. Bendikov  
Department of Organic Chemistry, Weizmann Institute of Science, Rehovot 76100 (Israel)  
Fax: (+) 972-8934-4142, E-mail: [michael.bendikov@weizmann.ac.il](mailto:michael.bendikov@weizmann.ac.il)  
Homepage: <http://www.weizmann.ac.il/oc/bendikov>

<sup>b</sup> Dr. G. Leitius  
Department of Chemical Research Support, Weizmann Institute of Science, Rehovot 76100  
(Israel)

<sup>c</sup> Prof. I. F. Perepichka  
School of Chemistry, Bangor University, Bangor, Gwynedd LL57 2UW (UK)

<sup>†</sup> Current address: Department of Food Science, The Volcani Center, ARO, Bet Dagan (Israel)

## Electrochemical polymerization of phenylene-bridged thiophenes **2a–d**.

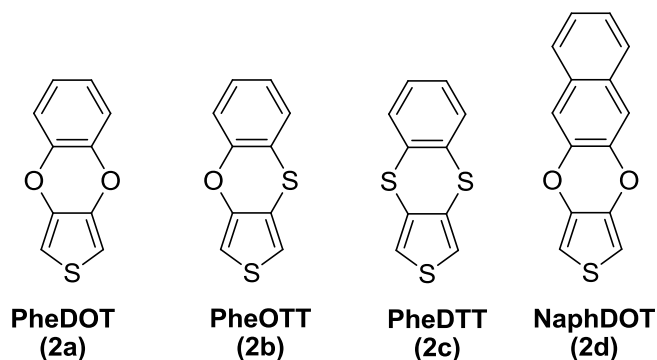

Electrochemical polymerization (ECP) of phenylene-bridged thiophenes **2a–c** was performed at potentiodynamic conditions by repeated cyclic voltammetry (CV) in dichloromethane solution with 0.1 M tetrabutylammonium hexafluorophosphate (TBAPF<sub>6</sub>) as a supporting electrolyte. As previously reported,<sup>1,2</sup> polymerization of **PheDOT (2a)** is difficult, but it can be polymerized in dichloromethane solution at high concentrations. Applying a scan rate of 50 mV/s and using a potential range of –0.4 to 1.6 V, we succeed in obtaining films of proper quality (Fig. S1a). **PheOTT (2b)** smoothly undergoes electropolymerization to deposit insoluble film on the electrode surface (Fig. S1b). The onset potential of polymer **PPheOTT (P2b)** is 0.12V vs. SCE. Electrochemical polymerization of **PheDTT (2c)** was problematic and we did not succeed in obtaining good films. The naphthalene-bridged **PNaphDOT (2d)** shows very similar electrochemical properties to its phenylene-bridged analogue (Fig. S1d).

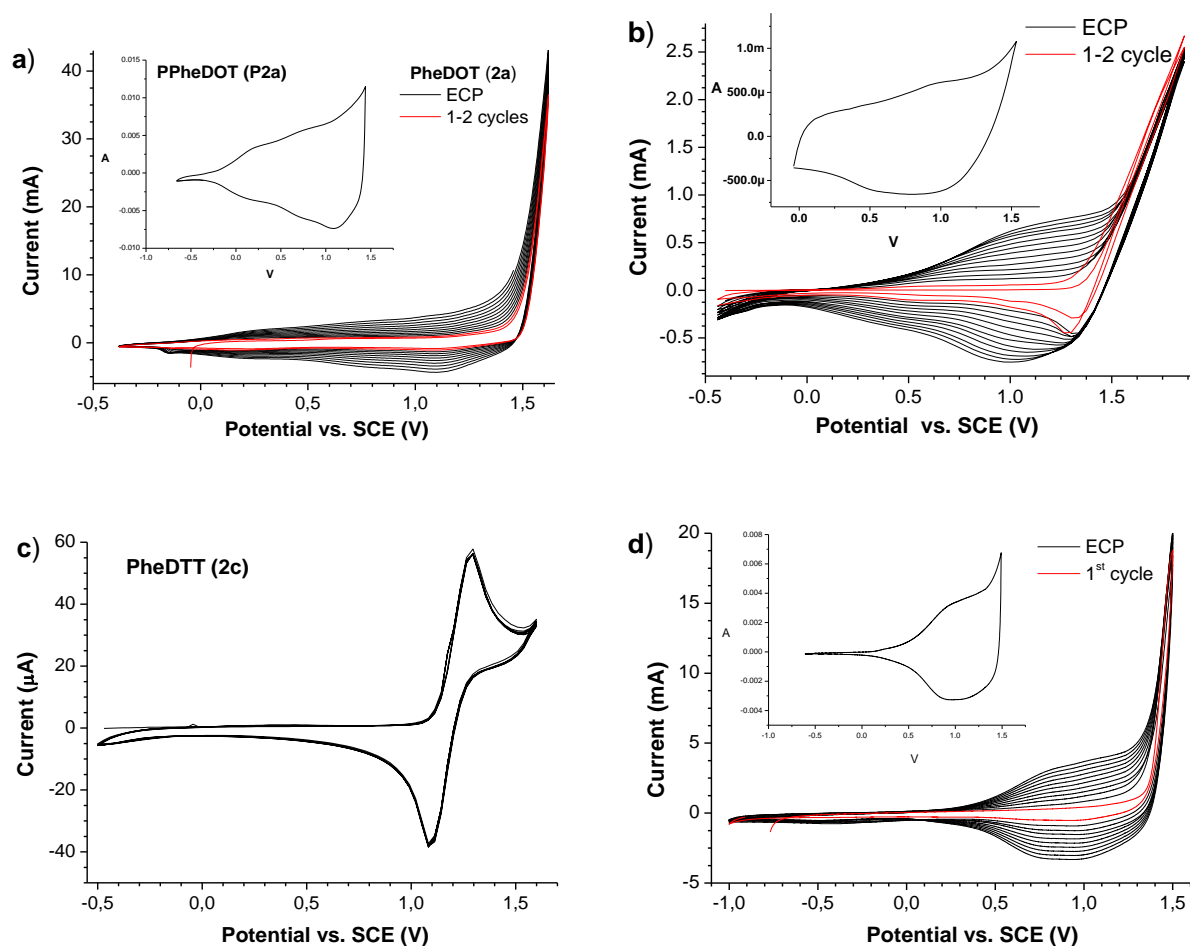

**Fig. S1** Potentiodynamic electropolymerization of thiophene monomers **2a-d** on ITO electrode in  $\text{CH}_2\text{Cl}_2/\text{TBAPF}_6$  (0.1M), scan rate 50 mV/s. Insets are CVs of electrodeposited polymers **P1a,b,d** in monomer free  $\text{CH}_2\text{Cl}_2/\text{TBAPF}_6$  (0.1M) solutions. (a) **PheDOT (2a)** and **PPhDOT (P1a)**. (b) **PheOTT (2b)** and **PPhOTT (P1b)**. (c) Repeated three CV scans of **PheDTT (2c)** in attempts of its electropolymerization. (d) **NaphDOT (2d)** and **PNaphDOT (P1d)**. All potentials are given vs. SCE and were calibrated to the  $\text{Fc}/\text{Fc}^+$  standard, which is 0.46 V vs. SCE under these conditions.<sup>3</sup>

## Electrochemical polymerization and spectroelectrochemistry of PEDOS.

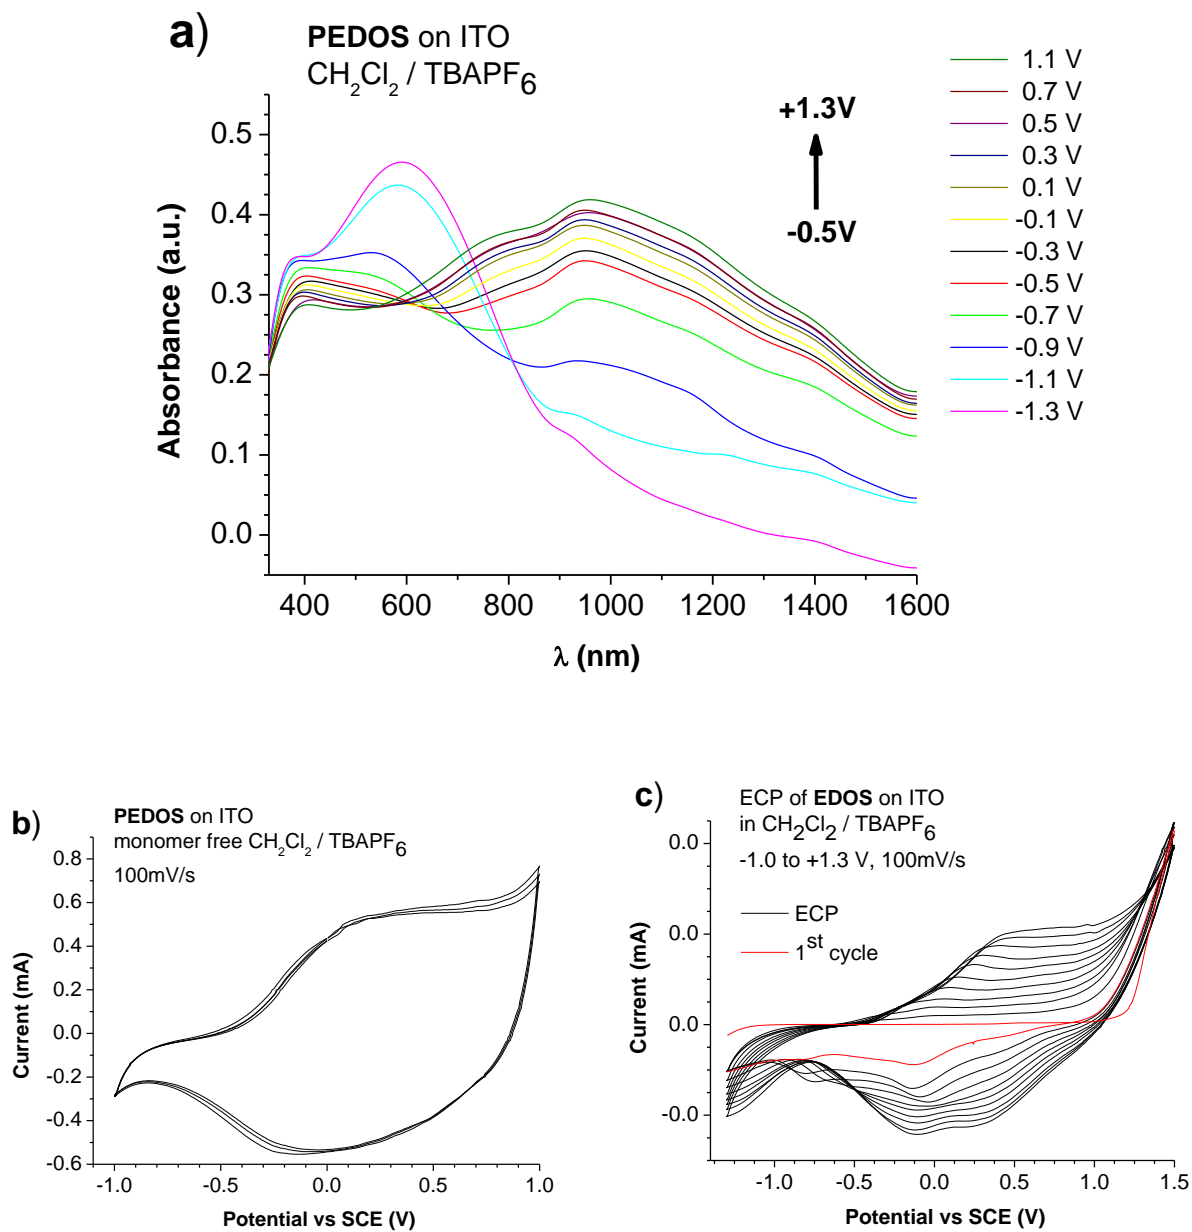

**Fig. S2** (a) Spectroelectrochemical measurements of **PEDOS** on ITO performed in  $\text{CH}_2\text{Cl}_2/\text{TBAPF}_6$  (0.1 M) under various potentials applied *in situ*. (b) CV measurements of the electrodeposited film of polymer **PEDOS** on ITO in monomer free  $\text{CH}_2\text{Cl}_2/\text{TBAPF}_6$  (0.1 M) solution at scan rate of 100 mV/s. (c) Electrochemical polymerization of **EDOS** monomer performed in  $\text{CH}_2\text{Cl}_2/\text{TBAPF}_6$  (0.1 M). All data are vs. SCE and were calibrated to the  $\text{Fc}/\text{Fc}^+$  standard, which is 0.46 V vs. SCE under these conditions.<sup>3</sup>

## Electrochemical polymerization and spectroelectrochemistry of phenylene-bridged polyselenophenes in acetonitrile and propylene carbonate.

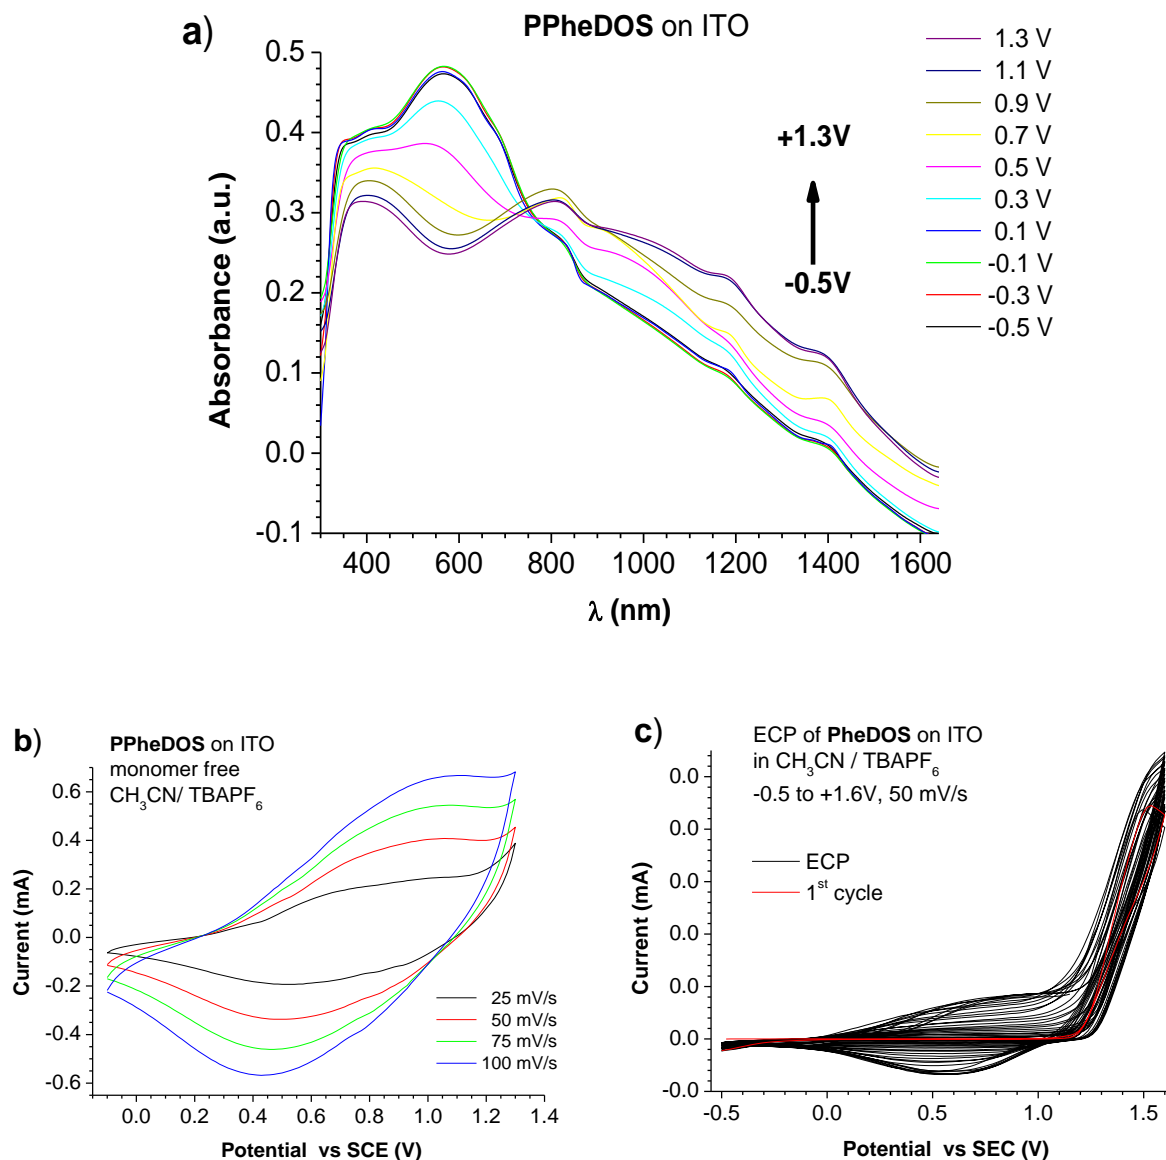

**Fig. S3** (a) Spectroelectrochemical measurements for polymer **PPhDOS (P1a)** on ITO performed in  $\text{CH}_3\text{CN}/\text{TBAPF}_6$  (0.1M) under various potentials applied *in situ*. (b) CV measurements of the electrodeposited film of polymer **PPhDOS (P1a)** on ITO in monomer free  $\text{CH}_3\text{CN}/\text{TBAPF}_6$  (0.1 M) solution at various scan rates. (c) Electrochemical polymerization of monomer **PheDOS (1a)** in  $\text{CH}_3\text{CN}/\text{TBAPF}_6$  (0.1 M) on ITO electrode. All data are given vs. SCE and were calibrated to the  $\text{Fc}/\text{Fc}^+$  standard, which is 0.40 V vs. SCE under these conditions.<sup>3</sup>

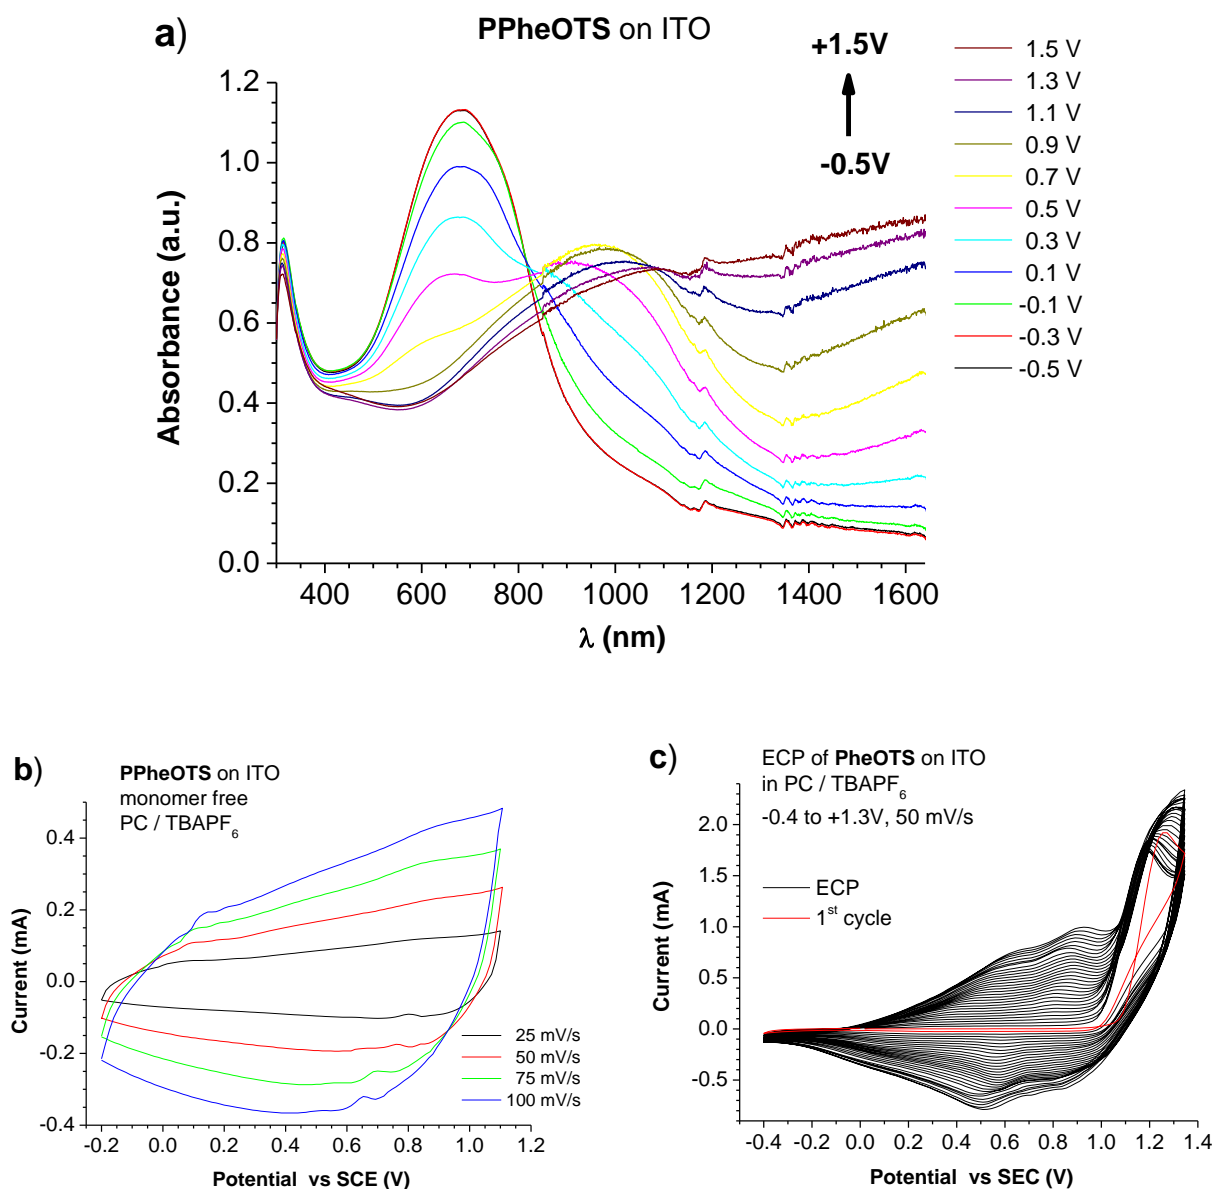

**Fig. S4** (a) Spectroelectrochemical measurements for polymer **PPhOTS (P1b)** on ITO performed in PC/TBAPF<sub>6</sub> (0.1 M) under various potentials applied *in situ*. (b) CV measurements of the electrodeposited film of polymer **PPhOTS (P1b)** on ITO in monomer free PC/TBAPF<sub>6</sub> (0.1 M) solution at various scan rates. (c) Electrochemical polymerization of monomer **PheOTS (1b)** in PC/TBAPF<sub>6</sub> (0.1 M) on ITO electrode. All data are given vs. SCE and were calibrated to the Fc/Fc<sup>+</sup> standard, which is 0.38 V vs. SCE under these conditions.<sup>3</sup>

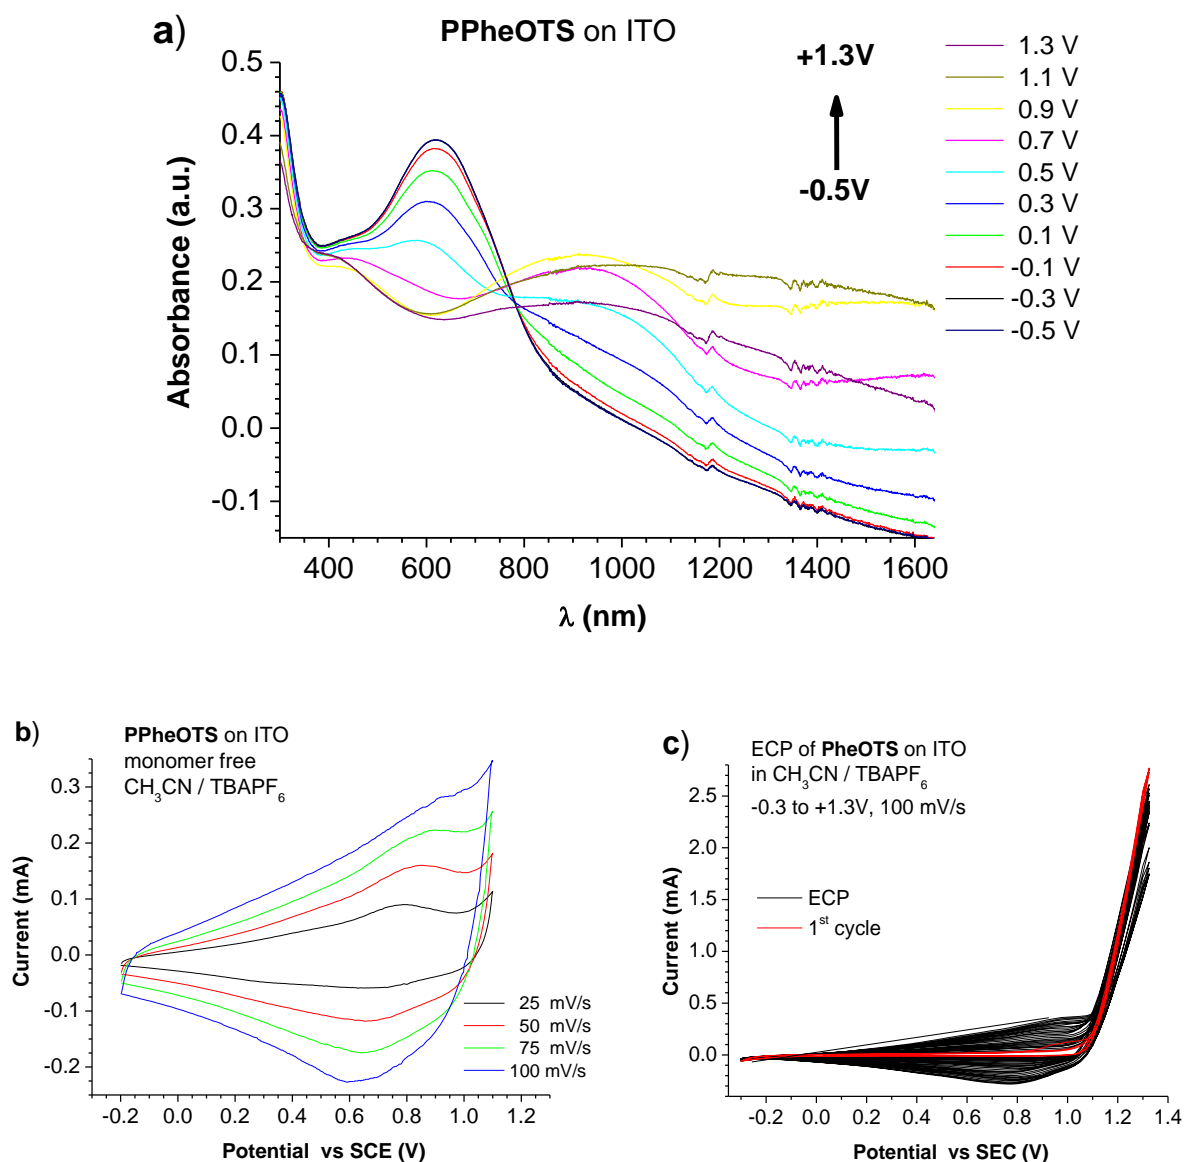

**Fig. S5** (a) Spectroelectrochemical measurements for polymer **PPhOTS (P1b)** on ITO performed in  $\text{CH}_3\text{CN}/\text{TBAPF}_6$  (0.1 M) under various potentials applied *in situ*. (b) CV measurements of the electrodeposited film of polymer **PPhOTS (P1b)** on ITO in monomer free  $\text{CH}_3\text{CN}/\text{TBAPF}_6$  (0.1 M) solution at various scan rates. (c) Electrochemical polymerization of monomer **PPhOTS (1b)** in  $\text{CH}_3\text{CN}/\text{TBAPF}_6$  (0.1 M) on ITO electrode. All data are given vs. SCE and were calibrated to the  $\text{Fc}/\text{Fc}^+$  standard which is 0.40 V vs. SCE under these conditions.<sup>3</sup>

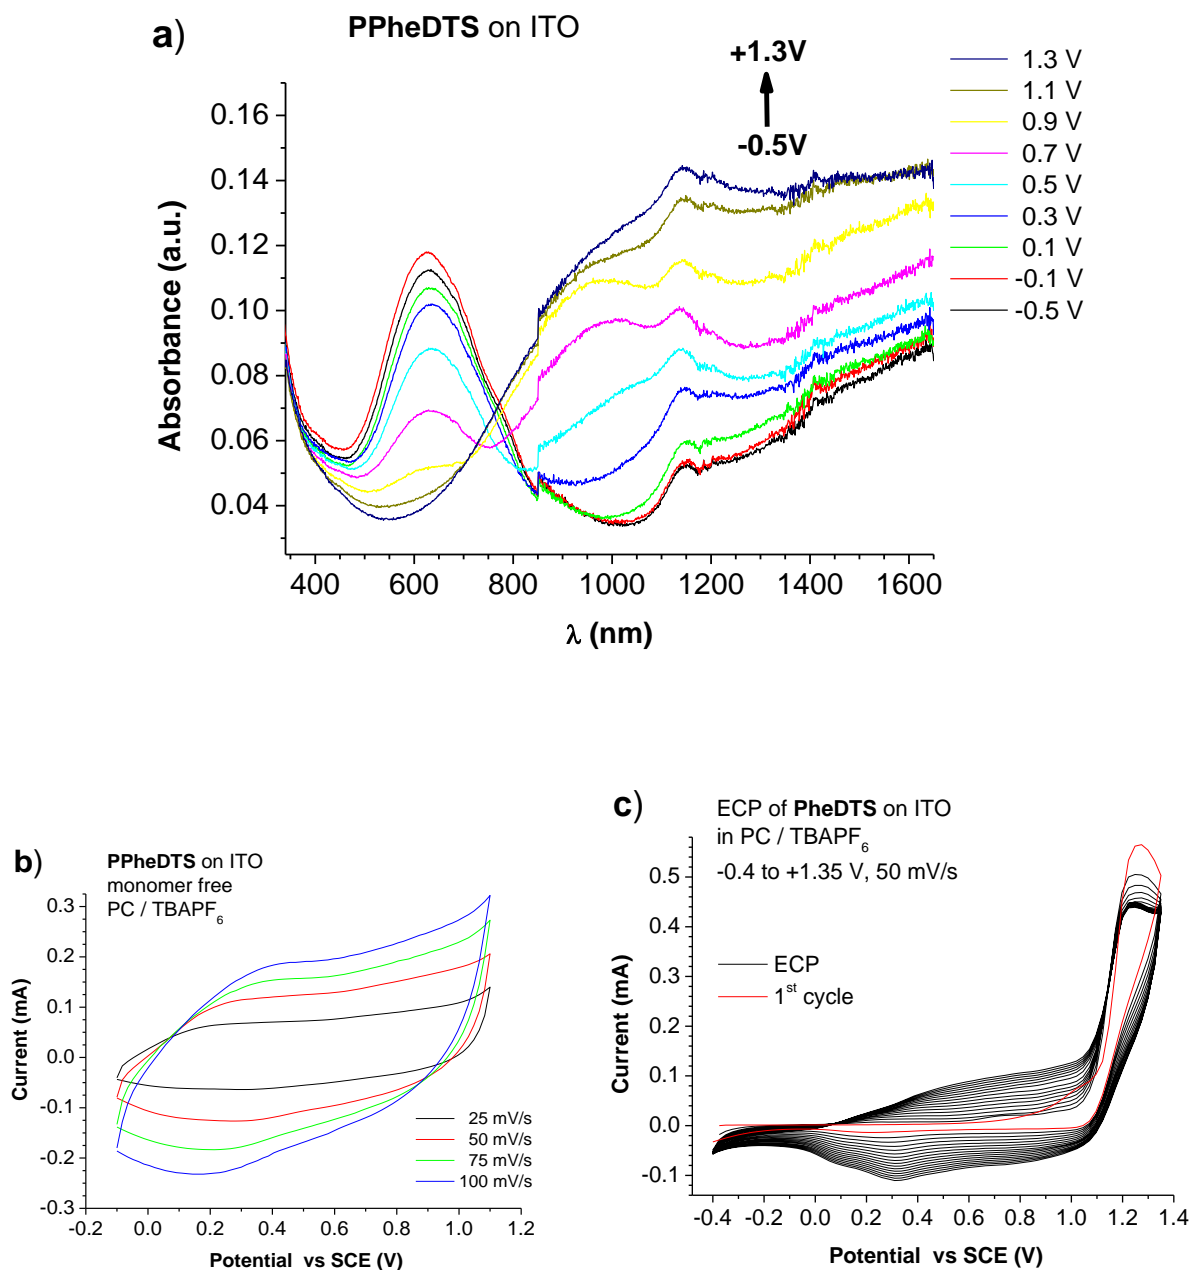

**Fig. S6** (a) Spectroelectrochemical measurements for polymer **PPhEDTS (P1c)** on ITO performed in PC/TBAPF<sub>6</sub> (0.1 M) under various potentials applied *in situ*. (b) CV measurements of the electrodeposited film of polymer **PPhEDTS (P1c)** on ITO in monomer free PC/TBAPF<sub>6</sub> (0.1 M) solution at various scan rates. (c) Electrochemical polymerization of monomer **PheDTS (1c)** in PC/TBAPF<sub>6</sub> (0.1 M) on ITO electrode. All data are given vs. SCE and were calibrated to the Fc/Fc<sup>+</sup> standard, which is 0.38 V vs. SCE under these conditions.<sup>3</sup>



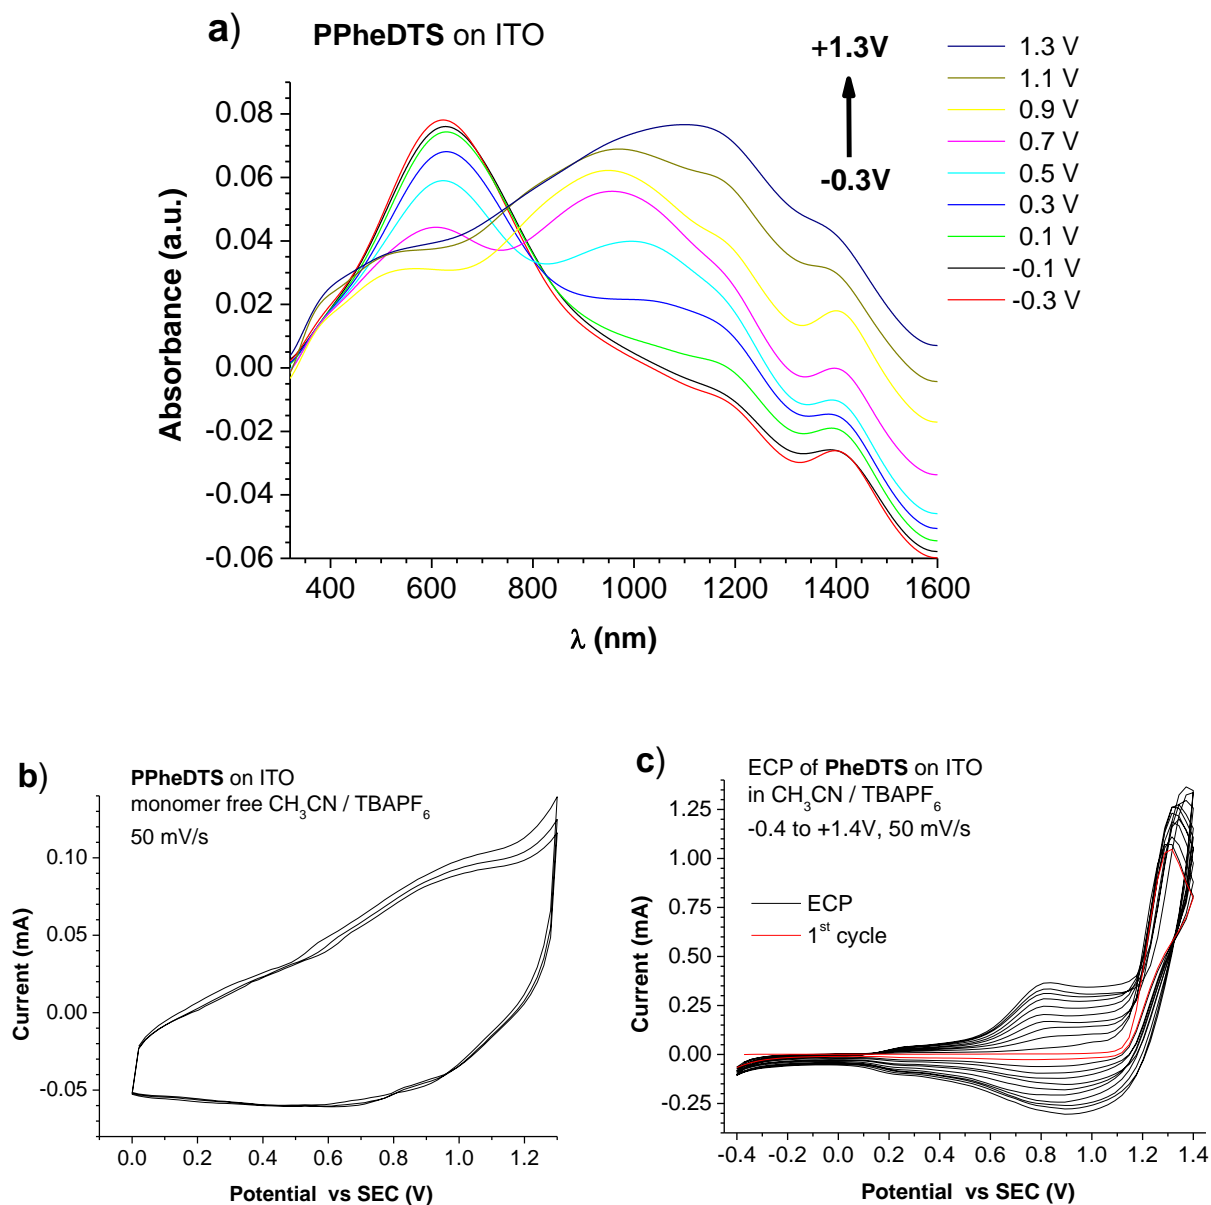

**Fig. S7** (a) Spectroelectrochemical measurements for polymer **PPhEDTS (P1c)** on ITO performed in  $\text{CH}_3\text{CN}/\text{TBAPF}_6$  (0.1 M) under various potentials applied *in situ*. (b) CV measurements of the electrodeposited film of polymer **PPhEDTS (P1c)** on ITO in monomer free  $\text{CH}_3\text{CN}/\text{TBAPF}_6$  (0.1 M) solution at scan rate of 50 mV/s. (c) Electrochemical polymerization of monomer **PPhEDTS (1c)** in  $\text{CH}_3\text{CN}/\text{TBAPF}_6$  (0.1 M) on ITO electrode. All data are given vs. SCE and were calibrated to the  $\text{Fc}/\text{Fc}^+$  standard, which is 0.40 V vs. SCE under these conditions.<sup>3</sup>

## Film Morphology

SEM measurements were performed on all poly[3,4-(phenylene-X,Y)selenophene] films (Fig. S8). The films were prepared on ITO in the CV mode in  $\text{CH}_2\text{Cl}_2$  using  $\text{TBAPF}_6$  as the supporting electrolyte and operating at 5 keV power. At a magnification of 1000, it can be observed that **PPheDOS (P1a)**, has a smoother structure than **PPheOTS (P1b)** and **PPheDTS (P1c)**. At high magnification (20,000), all poly[3,4-(phenylene-X,Y)selenophene] films show a globular coral-shaped morphology. Polymers that bear sulfur substituents at the 3,4-positions of the selenophene ring (**P1b** and **P1c**) form the films with a rough and bumpy surface with large pores that can achieve a diameter of 1  $\mu\text{m}$ , while the film of only oxygen-substituted **PPheDOS (P1a)** is thinner and less porous. Also, in thiophene-based polymer films, sulfur-substituted polymer **PPheOTT (P2b)** has a rougher structure than oxygen-substituted **PPheDOT (P2a)**.

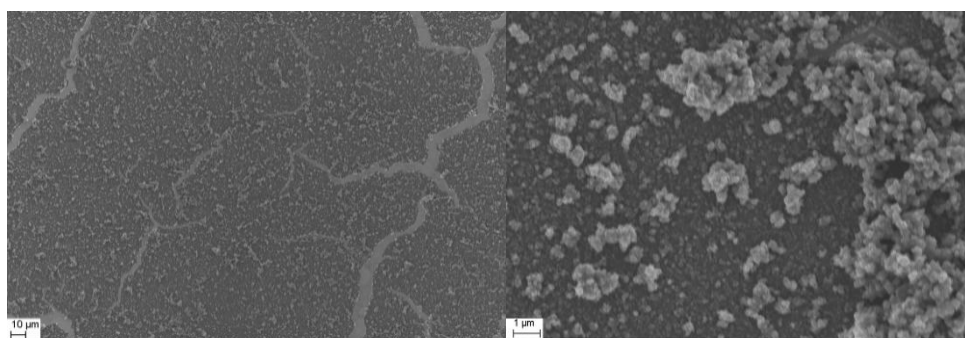

(a) **PPheDOS(P1a)**

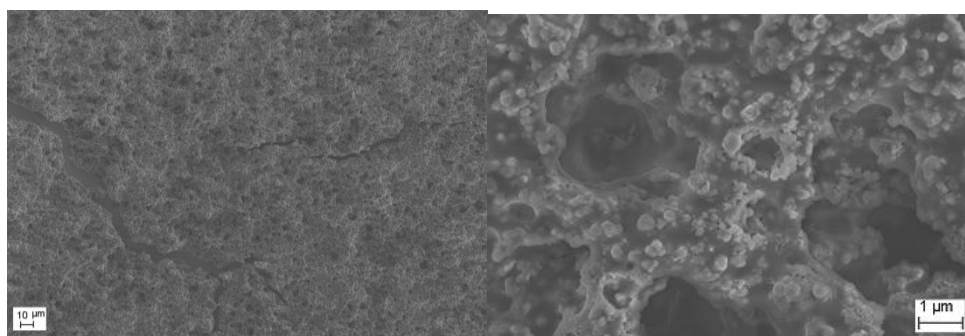

(b) **PPheOTS(P1b)**

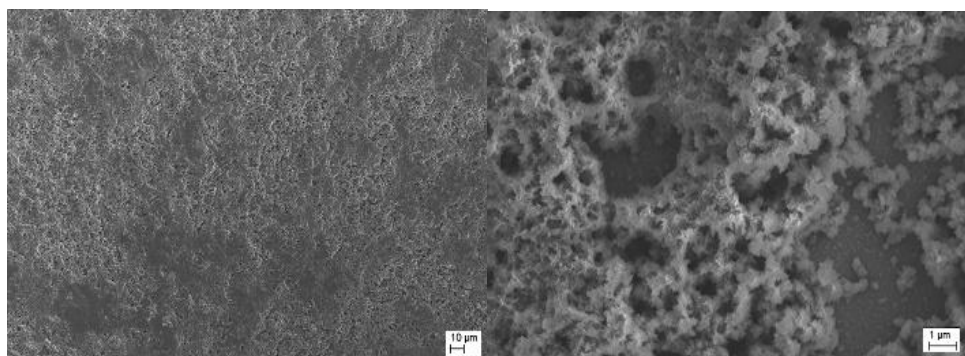

(c) **PPheDTS, P1c**

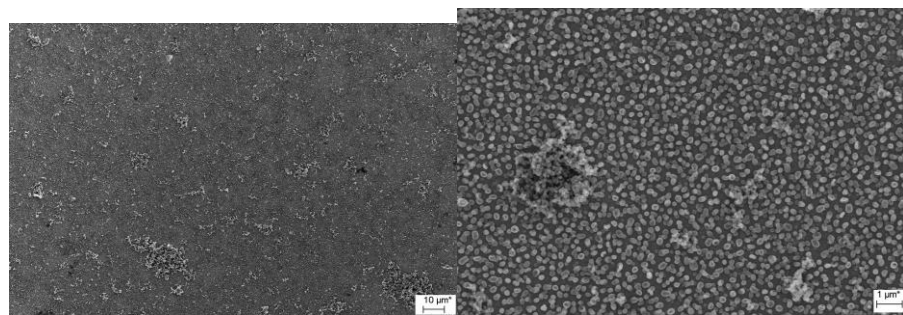

(d) **PPheDOT, P2a**

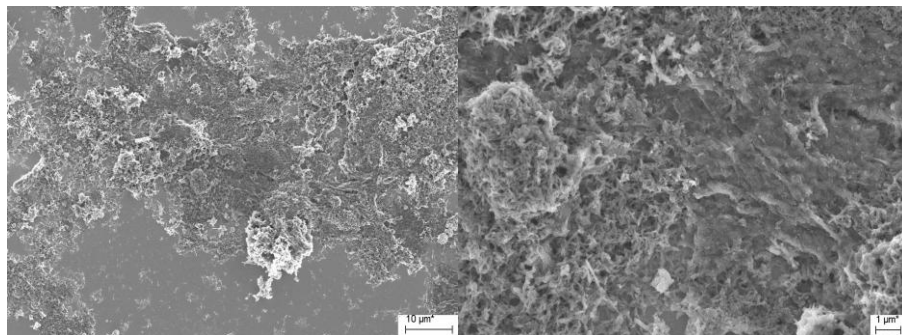

(e) **PPheOTT, P2b**

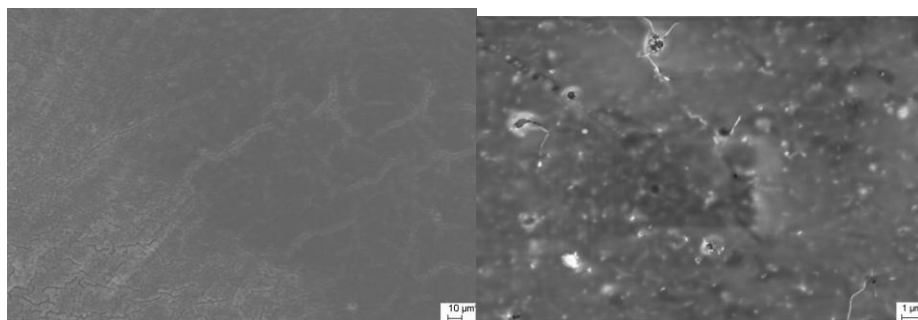

(f) **PNaphDOS, P1d**

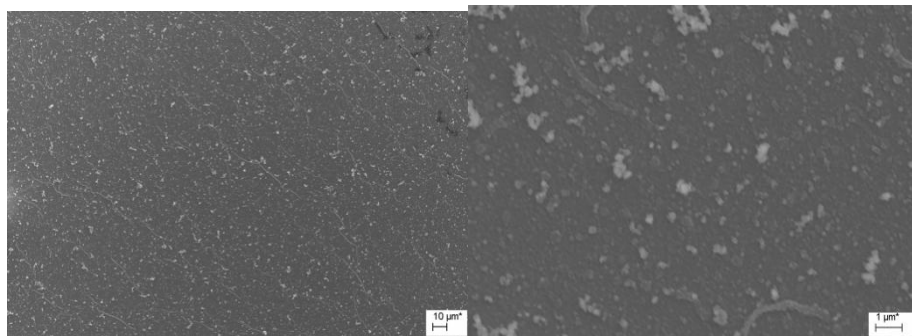

(g) **PNaphDOT, P2d**

**Fig. S8.** SEM images of polymer films prepared in  $\text{CH}_2\text{Cl}_2/\text{TBAPF}_6$ . (a) **PPheDOS (P1a)**. (b) **PPheOTS (P1b)**. (c) **PPheDTS (P1c)**. (d) **PPheDOT (P2a)**, (e) **PPheOTT (P2b)**. (f) **PNaphDOS (P1d)**. (g) **PNaphDOT (P2d)**. Magnification is  $\sim 1000$  (left images) and  $\sim 20000$  (right images), working distance is 3 mm, EHT is 5 keV.

### X-ray structural analysis of PheDOS (1a)

**PheDOS (1a)** was crystallized from ethyl acetate/hexane solution to give colorless crystals suitable for single crystal X-ray analysis.

**Crystal Data:** C<sub>10</sub>H<sub>6</sub>O<sub>2</sub>Se, colorless, plates, 0.40×0.30×0.05 mm<sup>3</sup>, monoclinic, P2(1)/n, a = 5.820(1) Å, b = 14.522(3) Å, c = 10.036(2)Å, β= 93.12(3)°, from 20 degrees of data, T = 120(2) K, V= 847.0(3) Å<sup>3</sup>, Z = 4, Fw = 237.11, Dc = 1.859 g/cm<sup>3</sup>, μ = 4.389 mm<sup>-1</sup>.

**Data Collection and Treatment:** Nonius Kappa CCD diffractometer, MoKα (g = 0.71073 Å), graphite monochromator, 11446 reflections collected, -7 ≤ h ≤ 7, 0 ≤ k ≤ 18, 0 ≤ l ≤ 13, frame scan width 1.0°, scan speed 1° per 120 sec, typical peak mosaicity of 0.612° , 2164 independent reflections (R-int = 0.056). The data were processed with Denzo-Scale pack.

**Solution and Refinement:** The structure was solved by direct methods with SHELXS. Full-matrix least-squares refinement based on F<sup>2</sup> with SHELXL-97. 146 parameters with 0 restraints, final R<sub>1</sub> = 0.0303 (based on F<sup>2</sup>) for data with I > 2σ(I) and R<sub>1</sub> = 0.0404 on 1939 reflections, goodness-of-fit on F<sup>2</sup> = 1.019, largest electron density peak = 0.247e/Å<sup>3</sup>, deepest hole = -0.253 e/Å<sup>3</sup>.

The structure is refined as disordered; the molecules C<sub>10</sub>H<sub>6</sub>O<sub>2</sub>Se in the crystal have two mutually inverted orientations with occupancies of approximately 55% and 45%. This result can be described either as statistical disordering of the molecules in the crystal or as presence of racemic twinning such as each twin domain contains molecules of only orientation. The analysis of molecule packing makes us to suggest the presence of twinning in the crystal with domains volume ratio close to 1:1.

## Computational Studies

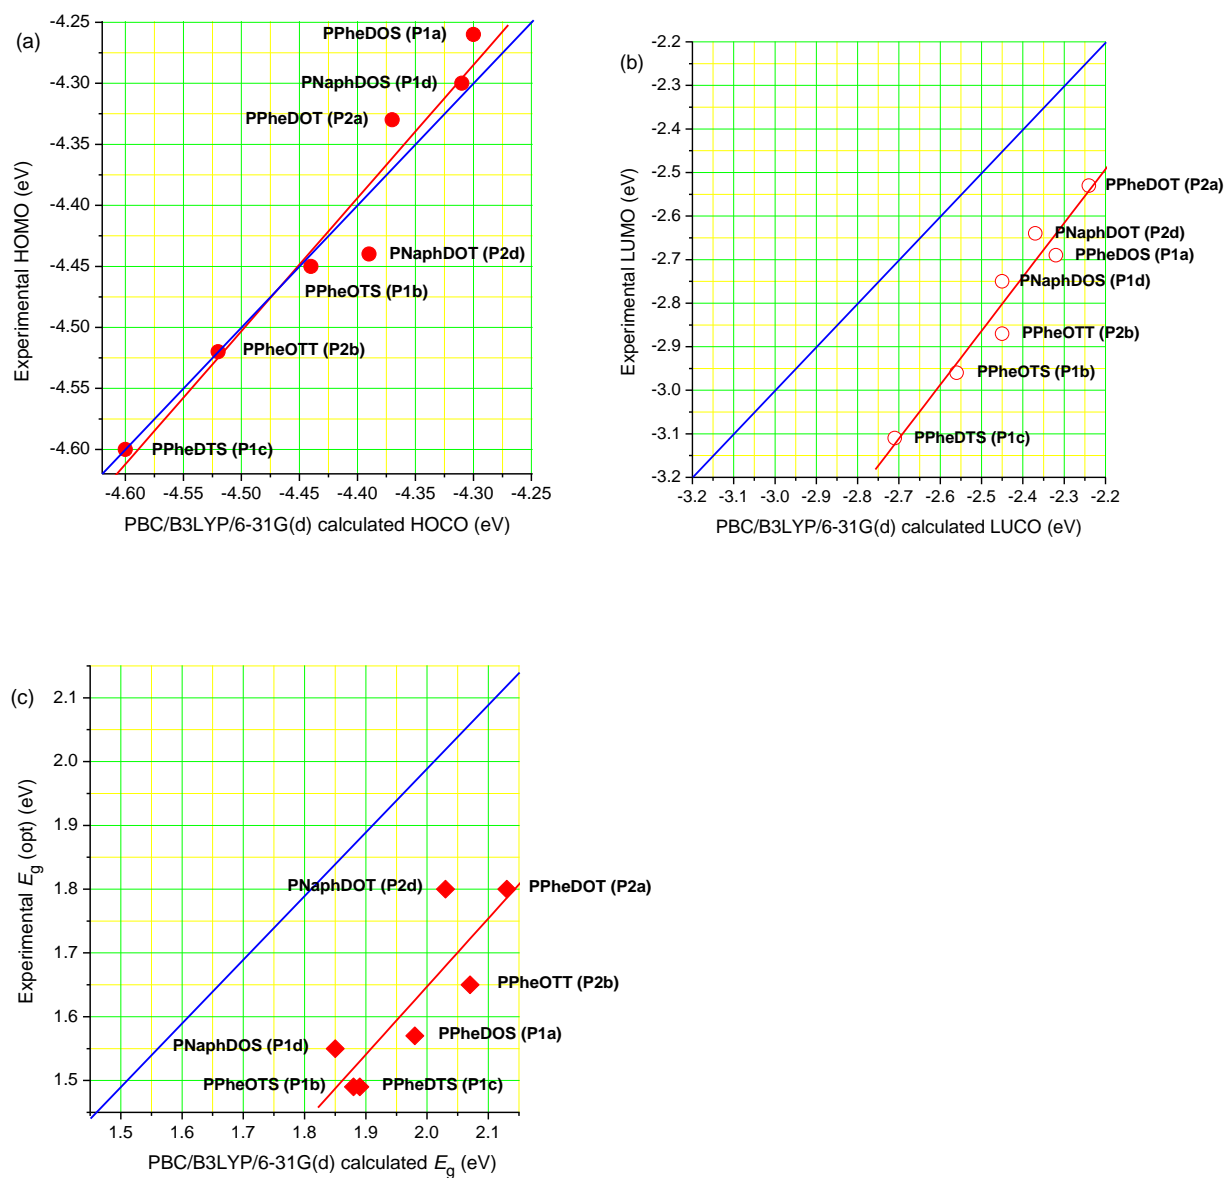

**Fig. S9** Correlation between calculated [PBC/B3LYP/6-31G(d)] and experimental energy levels for polymers **P1a-d**, **P2a,b,d**: a) HOMO vs. HOCO, b) LUMO vs. LUCO, c)  $E_g(\text{opt})$  vs.  $E_g(\text{calc})$ . Data have taken from Table 1. Straight blue lines correspond to bissectrices of equal  $E(\text{calc}) = E(\text{exp})$  energies. Red lines are linear fits between the experimental and calculated energies.



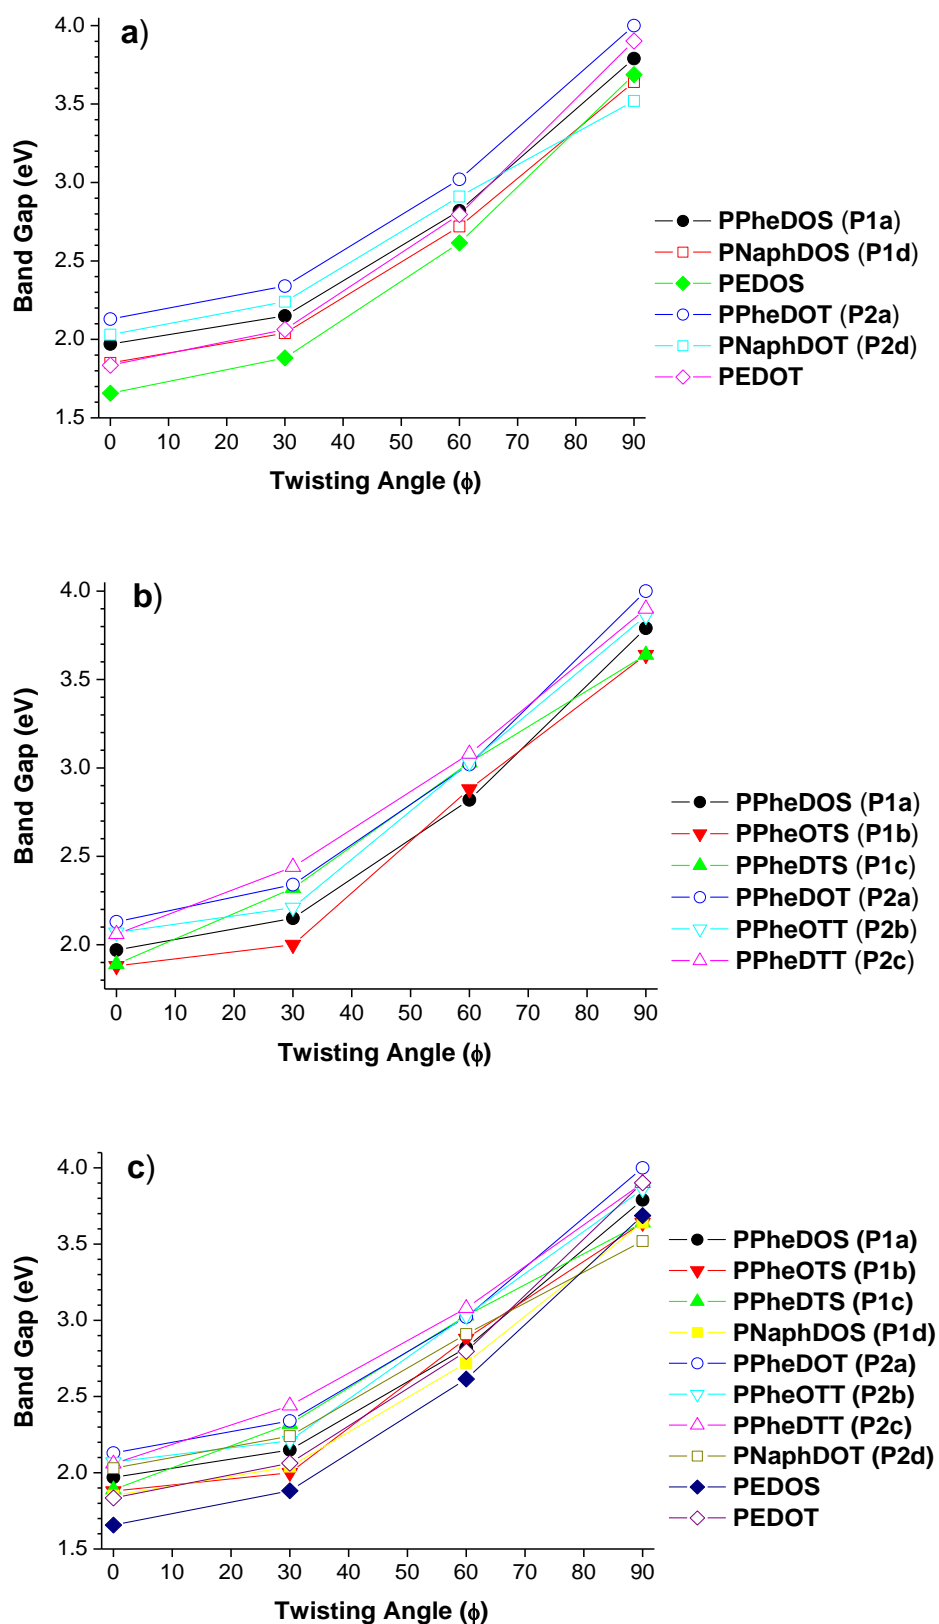

**Fig. S10** Band gap of polymers as a function of interring twist angle ( $\phi$ ) calculated at the PBC/B3LYP/6-31G(d) level of theory. PPhOTS (P1b) and PPhOTT (P2b) are shown as head-to-tail polymers. Numerical values are given in Table S2.

**Table S1.** Relative energies (kcal/mol)<sup>a</sup> of polymers as a function of interring twist angle ( $\varphi$ ) calculated at the PBC/B3LYP/6-31G(d) level of theory.

| Dihedral angle ( $\varphi$ ) | PPheDOS | PPheOTS | PPheDTS | PPheDOT | PPheOTT | PPheDTT | PNaphDOS | PNaphDOT | PEDOS | PEDOT |
|------------------------------|---------|---------|---------|---------|---------|---------|----------|----------|-------|-------|
| 0                            | 0       | 0       | 0       | 0       | 0       | 0.04    | 0        | 0        | 0     | 0     |
| 30                           | 2.01    | 1.75    | 1.38    | 1.27    | 0.94    | 0       | 2.04     | 1.28     | 2.19  | 1.45  |
| 60                           | 5.41    | 4.34    | 0.49    | 3.50    | 2.03    | 0.01    | 5.49     | 3.52     | 6.02  | 4.08  |
| 90                           | 8.16    | 6.49    | 1.65    | 5.47    | 3.78    | 1.19    | 8.28     | 5.52     | 8.98  | 6.24  |

<sup>a</sup> Relative to the minimum energy conformer.

**Table S2.** Energy gap (eV) of polymers as a function of interring twist angle ( $\varphi$ ) calculated at the PBC/B3LYP/6-31G(d) level of theory.

| Dihedral angle ( $\varphi$ ) | PPheDOS | PPheOTS | PPheDTS | PPheDOT | PPheOTT | PPheDTT | PNaphDOS | PNaphDOT | PEDOS | PEDOT |
|------------------------------|---------|---------|---------|---------|---------|---------|----------|----------|-------|-------|
| 0                            | 1.97    | 1.88    | 1.89    | 2.13    | 2.07    | 2.06    | 1.85     | 2.03     | 1.68  | 1.84  |
| 30                           | 2.15    | 2.00    | 2.32    | 2.34    | 2.21    | 2.44    | 2.04     | 2.24     | 1.88  | 2.06  |
| 60                           | 2.82    | 2.88    | 3.03    | 3.02    | 3.03    | 3.08    | 2.72     | 2.91     | 2.62  | 2.80  |
| 90                           | 3.79    | 3.64    | 3.64    | 4.00    | 3.86    | 3.90    | 3.64     | 3.52     | 3.69  | 3.90  |

**Table S3.** Calculated total energies (hartree) of polymers as a function of interring twist angle ( $\varphi$ ) calculated at the PBC/B3LYP/6-31G(d) level of theory.

| Dihedral angle ( $\varphi$ ) | PPheDOS      | PPheOTS      | PPheDTS      | PPheDOT      | PPheOTT      | PPheDTT      | PNaphDOS     | PNaphDOT     |
|------------------------------|--------------|--------------|--------------|--------------|--------------|--------------|--------------|--------------|
| 0                            | -5866.565807 | -6512.515710 | -7158.450310 | -1864.173098 | -2510.119497 | -3156.058644 | -6173.854124 | -2171.461188 |
| 30                           | -5866.559390 | -6512.510132 | -7158.445927 | -1864.169047 | -2510.116492 | -3156.058785 | -6173.847606 | -2171.457119 |
| 60                           | -5866.548551 | -6512.501886 | -7158.448760 | -1864.161956 | -2510.113038 | -3156.058760 | -6173.836621 | -2171.449982 |
| 90                           | -5866.539811 | -6512.495023 | -7158.445041 | -1864.155661 | -2510.107452 | -3156.054985 | -6173.827720 | -2171.443594 |

## Coordinates of compounds with planar geometry calculated at PBC/B3LYP/6-31G(d)

### PPheDOS, P1a

| Center<br>Number | Atomic<br>Number | Atomic<br>Type | Coordinates (Angstroms) |           |           |
|------------------|------------------|----------------|-------------------------|-----------|-----------|
|                  |                  |                | X                       | Y         | Z         |
| 1                | 6                | 0              | -0.707142               | 0.098208  | -0.000041 |
| 2                | 6                | 0              | -1.380296               | 1.298353  | 0.015073  |
| 3                | 6                | 0              | -2.792802               | 1.236427  | 0.014303  |
| 4                | 6                | 0              | -3.358840               | -0.017629 | -0.001298 |
| 5                | 6                | 0              | -2.888705               | 3.576641  | 0.043938  |
| 6                | 6                | 0              | -1.490474               | 3.638123  | 0.045011  |
| 7                | 6                | 0              | -0.847578               | 4.871114  | 0.061310  |
| 8                | 1                | 0              | 0.237790                | 4.883426  | 0.061843  |
| 9                | 6                | 0              | -1.598997               | 6.046881  | 0.076372  |
| 10               | 6                | 0              | -2.993784               | 5.985388  | 0.075108  |
| 11               | 6                | 0              | -3.638218               | 4.747817  | 0.058904  |
| 12               | 1                | 0              | -1.091843               | 7.006680  | 0.089085  |
| 13               | 1                | 0              | -3.583723               | 6.896665  | 0.086763  |
| 14               | 1                | 0              | -4.720354               | 4.663392  | 0.057523  |
| 15               | 8                | 0              | -0.708086               | 2.499250  | 0.030138  |
| 16               | 8                | 0              | -3.567738               | 2.373462  | 0.028295  |
| 17               | 34               | 0              | -1.973536               | -1.322436 | -0.017995 |
| 18               | 6                | 0              | 0.707149                | -0.098165 | -0.002693 |
| 19               | 6                | 0              | 1.380301                | -1.298310 | -0.017808 |
| 20               | 34               | 0              | 1.973544                | 1.322483  | 0.014848  |
| 21               | 6                | 0              | 2.792807                | -1.236387 | -0.017068 |
| 22               | 8                | 0              | 0.708088                | -2.499207 | -0.032847 |
| 23               | 6                | 0              | 3.358846                | 0.017670  | -0.001615 |
| 24               | 8                | 0              | 3.567740                | -2.373423 | -0.031096 |
| 25               | 6                | 0              | 1.490473                | -3.638104 | -0.045889 |
| 26               | 6                | 0              | 2.888705                | -3.576624 | -0.044865 |
| 27               | 6                | 0              | 0.847574                | -4.871115 | -0.060391 |
| 28               | 6                | 0              | 3.638215                | -4.747822 | -0.058113 |
| 29               | 1                | 0              | -0.237794               | -4.883425 | -0.060893 |
| 30               | 6                | 0              | 1.598990                | -6.046904 | -0.073790 |
| 31               | 6                | 0              | 2.993777                | -5.985413 | -0.072597 |
| 32               | 1                | 0              | 4.720351                | -4.663399 | -0.056808 |
| 33               | 1                | 0              | 1.091833                | -7.006718 | -0.085136 |
| 34               | 1                | 0              | 3.583713                | -6.896708 | -0.082946 |
| 35               | -2               | 0              | 8.109755                | 0.352463  | 0.003383  |

### PPheOTS, P1b.

| Center<br>Number | Atomic<br>Number | Atomic<br>Type | Coordinates (Angstroms) |          |           |
|------------------|------------------|----------------|-------------------------|----------|-----------|
|                  |                  |                | X                       | Y        | Z         |
| 1                | 6                | 0              | -1.225478               | 0.089380 | 0.056964  |
| 2                | 6                | 0              | -1.826565               | 1.277390 | -0.306233 |



|    |    |   |           |           |           |
|----|----|---|-----------|-----------|-----------|
| 3  | 6  | 0 | -3.240897 | 1.355506  | -0.248293 |
| 4  | 6  | 0 | -3.880470 | 0.210335  | 0.197015  |
| 5  | 8  | 0 | -1.050803 | 2.334513  | -0.729074 |
| 6  | 16 | 0 | -4.035514 | 2.846949  | -0.809615 |
| 7  | 34 | 0 | -2.582527 | -1.148044 | 0.538824  |
| 8  | 6  | 0 | -2.764169 | 4.007841  | -0.336167 |
| 9  | 6  | 0 | -1.422305 | 3.617879  | -0.358064 |
| 10 | 6  | 0 | -3.082962 | 5.327606  | -0.004354 |
| 11 | 6  | 0 | -0.406321 | 4.516330  | -0.045648 |
| 12 | 6  | 0 | -2.069500 | 6.242525  | 0.283328  |
| 13 | 1  | 0 | -4.125038 | 5.632698  | 0.025182  |
| 14 | 6  | 0 | -0.733565 | 5.836145  | 0.264566  |
| 15 | 1  | 0 | 0.618399  | 4.159606  | -0.047122 |
| 16 | 1  | 0 | -2.326399 | 7.267705  | 0.532792  |
| 17 | 1  | 0 | 0.056358  | 6.542212  | 0.503069  |
| 18 | 6  | 0 | 0.179995  | -0.181878 | 0.066383  |
| 19 | 6  | 0 | 0.854276  | -1.340398 | 0.415457  |
| 20 | 34 | 0 | 1.442930  | 1.159702  | -0.435678 |
| 21 | 6  | 0 | 2.265272  | -1.282968 | 0.289824  |
| 22 | 16 | 0 | 0.117023  | -2.824314 | 1.067759  |
| 23 | 6  | 0 | 2.832401  | -0.100086 | -0.138526 |
| 24 | 8  | 0 | 3.073086  | -2.354599 | 0.601085  |
| 25 | 6  | 0 | 1.297789  | -3.999962 | 0.426580  |
| 26 | 6  | 0 | 2.636718  | -3.629603 | 0.274784  |
| 27 | 6  | 0 | 0.918506  | -5.312764 | 0.132981  |
| 28 | 6  | 0 | 3.589485  | -4.540216 | -0.172419 |
| 29 | 6  | 0 | 1.871810  | -6.240162 | -0.288995 |
| 30 | 1  | 0 | -0.123063 | -5.602591 | 0.238036  |
| 31 | 6  | 0 | 3.204708  | -5.853183 | -0.443409 |
| 32 | 1  | 0 | 4.610782  | -4.197813 | -0.302892 |
| 33 | 1  | 0 | 1.568991  | -7.259870 | -0.507478 |
| 34 | 1  | 0 | 3.945874  | -6.568885 | -0.786665 |
| 35 | -2 | 0 | 8.109090  | -0.059967 | -0.527423 |

-----  
**PPheDTS, P1c.**

| Center<br>Number | Atomic<br>Number | Atomic<br>Type | Coordinates (Angstroms) |           |           |
|------------------|------------------|----------------|-------------------------|-----------|-----------|
|                  |                  |                | X                       | Y         | Z         |
| 1                | 6                | 0              | -0.713633               | 0.166686  | -1.230462 |
| 2                | 6                | 0              | -1.367760               | 1.394442  | -1.213312 |
| 3                | 6                | 0              | -2.797879               | 1.363991  | -1.194448 |
| 4                | 6                | 0              | -3.397739               | 0.108705  | -1.186105 |
| 5                | 6                | 0              | -2.815174               | 3.845411  | 0.005116  |
| 6                | 6                | 0              | -1.414411               | 3.875368  | -0.017847 |
| 7                | 6                | 0              | -0.716587               | 4.654747  | 0.909132  |
| 8                | 1                | 0              | 0.369283                | 4.653079  | 0.899352  |
| 9                | 6                | 0              | -1.419069               | 5.428356  | 1.833783  |
| 10               | 6                | 0              | -2.815024               | 5.398598  | 1.856831  |
| 11               | 6                | 0              | -3.514241               | 4.595227  | 0.955341  |
| 12               | 1                | 0              | -0.874567               | 6.042202  | 2.545595  |
| 13               | 1                | 0              | -3.361364               | 5.989156  | 2.586710  |
| 14               | 1                | 0              | -4.598819               | 4.548153  | 0.981654  |
| 15               | 34               | 0              | -2.026768               | -1.211544 | -1.215775 |

|    |    |   |           |           |           |
|----|----|---|-----------|-----------|-----------|
| 16 | 6  | 0 | 0.699290  | -0.129766 | -1.241872 |
| 17 | 6  | 0 | 1.353419  | -1.357510 | -1.259022 |
| 18 | 34 | 0 | 2.012701  | 1.247979  | -1.212888 |
| 19 | 6  | 0 | 2.783658  | -1.327350 | -1.256036 |
| 20 | 6  | 0 | 3.383747  | -0.072443 | -1.228076 |
| 21 | 6  | 0 | 1.412662  | -3.862873 | -0.116856 |
| 22 | 6  | 0 | 2.813596  | -3.833253 | -0.108595 |
| 23 | 6  | 0 | 0.724845  | -4.661557 | 0.801091  |
| 24 | 6  | 0 | 3.522897  | -4.602759 | 0.818021  |
| 25 | 1  | 0 | -0.361059 | -4.659826 | 0.803067  |
| 26 | 6  | 0 | 1.437277  | -5.454260 | 1.701645  |
| 27 | 6  | 0 | 2.833403  | -5.424843 | 1.710086  |
| 28 | 1  | 0 | 4.607705  | -4.556194 | 0.833495  |
| 29 | 1  | 0 | 0.900526  | -6.082991 | 2.406320  |
| 30 | 1  | 0 | 3.387555  | -6.030525 | 2.421450  |
| 31 | 16 | 0 | -3.698072 | 2.908051  | -1.233299 |
| 32 | 16 | 0 | -0.534852 | 2.973926  | -1.284494 |
| 33 | 16 | 0 | 0.519550  | -2.935167 | -1.354747 |
| 34 | 16 | 0 | 3.683105  | -2.870230 | -1.336837 |
| 35 | -2 | 0 | 8.179853  | 0.177684  | -0.046405 |

---

#### PPheDOT, P2a.

---

| Center<br>Number | Atomic<br>Number | Atomic<br>Type | Coordinates (Angstroms) |           |           |
|------------------|------------------|----------------|-------------------------|-----------|-----------|
|                  |                  |                | X                       | Y         | Z         |
| 1                | 6                | 0              | -0.691026               | 0.195963  | 0.000726  |
| 2                | 6                | 0              | -1.218780               | 1.469492  | 0.010075  |
| 3                | 6                | 0              | -2.630398               | 1.519290  | 0.010246  |
| 4                | 6                | 0              | -3.246482               | 0.286092  | 0.001028  |
| 5                | 6                | 0              | -2.542083               | 3.850573  | 0.027891  |
| 6                | 6                | 0              | -1.142156               | 3.801282  | 0.027707  |
| 7                | 6                | 0              | -0.404179               | 4.980092  | 0.036963  |
| 8                | 1                | 0              | 0.678966                | 4.909531  | 0.036588  |
| 9                | 6                | 0              | -1.059578               | 6.211940  | 0.046425  |
| 10               | 6                | 0              | -2.454488               | 6.261065  | 0.046629  |
| 11               | 6                | 0              | -3.195062               | 5.078475  | 0.037360  |
| 12               | 1                | 0              | -0.477588               | 7.128384  | 0.053651  |
| 13               | 1                | 0              | -2.970394               | 7.216266  | 0.054023  |
| 14               | 1                | 0              | -4.280492               | 5.084058  | 0.037292  |
| 15               | 8                | 0              | -0.447422               | 2.604132  | 0.018536  |
| 16               | 8                | 0              | -3.319735               | 2.705599  | 0.018850  |
| 17               | 6                | 0              | 0.691025                | -0.195955 | -0.001912 |
| 18               | 6                | 0              | 1.218780                | -1.469485 | -0.011261 |
| 19               | 6                | 0              | 2.630398                | -1.519283 | -0.011410 |
| 20               | 8                | 0              | 0.447422                | -2.604124 | -0.019813 |
| 21               | 6                | 0              | 3.246481                | -0.286084 | -0.002172 |
| 22               | 8                | 0              | 3.319735                | -2.705590 | -0.020072 |
| 23               | 6                | 0              | 1.142156                | -3.801280 | -0.028260 |
| 24               | 6                | 0              | 2.542084                | -3.850570 | -0.028411 |
| 25               | 6                | 0              | 0.404180                | -4.980094 | -0.036873 |
| 26               | 6                | 0              | 3.195064                | -5.078477 | -0.037196 |
| 27               | 1                | 0              | -0.678965               | -4.909534 | -0.036540 |
| 28               | 6                | 0              | 1.059580                | -6.211948 | -0.045682 |

|    |    |   |           |           |           |
|----|----|---|-----------|-----------|-----------|
| 29 | 6  | 0 | 2.454490  | -6.261072 | -0.045846 |
| 30 | 1  | 0 | 4.280493  | -5.084059 | -0.037110 |
| 31 | 1  | 0 | 0.477590  | -7.128396 | -0.052422 |
| 32 | 1  | 0 | 2.970397  | -7.216276 | -0.052720 |
| 33 | 16 | 0 | -2.011754 | -0.980375 | -0.008120 |
| 34 | 16 | 0 | 2.011753  | 0.980383  | 0.006931  |
| 35 | -2 | 0 | 7.899234  | -0.277580 | -0.000832 |

---

#### PPheOTT, P2b.

---

| Center<br>Number | Atomic<br>Number | Atomic<br>Type | Coordinates (Angstroms) |           |           |
|------------------|------------------|----------------|-------------------------|-----------|-----------|
|                  |                  |                | X                       | Y         | Z         |
| 1                | 6                | 0              | -1.201639               | 0.130274  | 0.037439  |
| 2                | 6                | 0              | -1.779983               | 1.344948  | -0.283792 |
| 3                | 6                | 0              | -3.195183               | 1.383238  | -0.215116 |
| 4                | 6                | 0              | -3.755981               | 0.175876  | 0.180103  |
| 5                | 8                | 0              | -1.011228               | 2.416033  | -0.662423 |
| 6                | 16               | 0              | -4.051122               | 2.863073  | -0.698510 |
| 7                | 6                | 0              | -2.780647               | 4.045377  | -0.278203 |
| 8                | 6                | 0              | -1.427910               | 3.695092  | -0.327938 |
| 9                | 6                | 0              | -3.129872               | 5.363141  | 0.032861  |
| 10               | 6                | 0              | -0.434661               | 4.638277  | -0.076645 |
| 11               | 6                | 0              | -2.140825               | 6.318042  | 0.267318  |
| 12               | 1                | 0              | -4.180085               | 5.636086  | 0.084498  |
| 13               | 6                | 0              | -0.794018               | 5.954608  | 0.211277  |
| 14               | 1                | 0              | 0.603631                | 4.324458  | -0.115642 |
| 15               | 1                | 0              | -2.424380               | 7.339944  | 0.500673  |
| 16               | 1                | 0              | -0.019903               | 6.692093  | 0.401798  |
| 17               | 6                | 0              | 0.198433                | -0.210360 | 0.058374  |
| 18               | 6                | 0              | 0.825909                | -1.408762 | 0.372126  |
| 19               | 6                | 0              | 2.238196                | -1.342069 | 0.270984  |
| 20               | 16               | 0              | 0.062953                | -2.908930 | 0.940792  |
| 21               | 6                | 0              | 2.750108                | -0.113738 | -0.105864 |
| 22               | 8                | 0              | 3.067369                | -2.399968 | 0.544674  |
| 23               | 6                | 0              | 1.296660                | -4.062273 | 0.361140  |
| 24               | 6                | 0              | 2.638398                | -3.684891 | 0.250644  |
| 25               | 6                | 0              | 0.938343                | -5.384955 | 0.083000  |
| 26               | 6                | 0              | 3.612345                | -4.605711 | -0.127297 |
| 27               | 6                | 0              | 1.910373                | -6.317825 | -0.277484 |
| 28               | 1                | 0              | -0.104891               | -5.679140 | 0.155701  |
| 29               | 6                | 0              | 3.246713                | -5.927309 | -0.381386 |
| 30               | 1                | 0              | 4.641349                | -4.270586 | -0.210944 |
| 31               | 1                | 0              | 1.620676                | -7.343812 | -0.483834 |
| 32               | 1                | 0              | 4.006372                | -6.647547 | -0.670496 |
| 33               | 16               | 0              | -2.476273               | -1.019499 | 0.428158  |
| 34               | 16               | 0              | 1.415574                | 1.012350  | -0.331229 |
| 35               | -2               | 0              | 7.886402                | 0.078401  | -0.475405 |

---

#### PPheDTT, P2c.

---

| Center | Atomic | Atomic | Coordinates (Angstroms) |  |  |
|--------|--------|--------|-------------------------|--|--|
|--------|--------|--------|-------------------------|--|--|

| Number | Number | Type | X         | Y         | Z         |
|--------|--------|------|-----------|-----------|-----------|
| 1      | 6      | 0    | -0.704659 | 0.201946  | -1.169720 |
| 2      | 6      | 0    | -1.318373 | 1.452710  | -1.152745 |
| 3      | 6      | 0    | -2.744556 | 1.405370  | -1.154518 |
| 4      | 6      | 0    | -3.274306 | 0.116855  | -1.174521 |
| 5      | 6      | 0    | -2.817642 | 3.868901  | 0.061751  |
| 6      | 6      | 0    | -1.416952 | 3.915044  | 0.066228  |
| 7      | 6      | 0    | -0.749273 | 4.714240  | 0.999400  |
| 8      | 1      | 0    | 0.336636  | 4.725843  | 1.011562  |
| 9      | 6      | 0    | -1.477662 | 5.491175  | 1.900495  |
| 10     | 6      | 0    | -2.873064 | 5.445209  | 1.895931  |
| 11     | 6      | 0    | -3.542726 | 4.622230  | 0.990211  |
| 12     | 1      | 0    | -0.953970 | 6.119576  | 2.615199  |
| 13     | 1      | 0    | -3.441680 | 6.037543  | 2.607097  |
| 14     | 1      | 0    | -4.627122 | 4.562326  | 0.994776  |
| 15     | 6      | 0    | 0.700045  | -0.160629 | -1.177826 |
| 16     | 6      | 0    | 1.313800  | -1.411362 | -1.194802 |
| 17     | 6      | 0    | 2.739960  | -1.363907 | -1.201886 |
| 18     | 6      | 0    | 3.269622  | -0.075205 | -1.193385 |
| 19     | 6      | 0    | 1.416160  | -3.903017 | -0.037514 |
| 20     | 6      | 0    | 2.816816  | -3.856313 | -0.045448 |
| 21     | 6      | 0    | 0.751708  | -4.725632 | 0.877384  |
| 22     | 6      | 0    | 3.545110  | -4.632215 | 0.861698  |
| 23     | 1      | 0    | -0.334145 | -4.738249 | 0.892463  |
| 24     | 6      | 0    | 1.483226  | -5.524501 | 1.756497  |
| 25     | 6      | 0    | 2.878582  | -5.477750 | 1.748757  |
| 26     | 1      | 0    | 4.629492  | -4.572011 | 0.864331  |
| 27     | 1      | 0    | 0.962041  | -6.170921 | 2.456818  |
| 28     | 1      | 0    | 3.449622  | -6.087437 | 2.443118  |
| 29     | 16     | 0    | -3.688028 | 2.915415  | -1.174328 |
| 30     | 16     | 0    | -0.476978 | 3.022255  | -1.164495 |
| 31     | 16     | 0    | 0.472108  | -2.980020 | -1.242563 |
| 32     | 16     | 0    | 3.683273  | -2.873032 | -1.260800 |
| 33     | 16     | 0    | -1.949535 | -1.044396 | -1.217829 |
| 34     | 16     | 0    | 1.944674  | 1.086637  | -1.201881 |
| 35     | -2     | 0    | 7.921691  | 0.262257  | -0.016719 |

### PNaphDOT, P2d.

| Center Number | Atomic Number | Atomic Type | Coordinates (Angstroms) |          |           |
|---------------|---------------|-------------|-------------------------|----------|-----------|
|               |               |             | X                       | Y        | Z         |
| 1             | 6             | 0           | 3.255680                | 0.168128 | -0.000015 |
| 2             | 6             | 0           | 2.683261                | 1.423263 | -0.001285 |
| 3             | 6             | 0           | 1.272356                | 1.424697 | -0.001308 |
| 4             | 6             | 0           | 0.697390                | 0.170723 | -0.000026 |
| 5             | 6             | 0           | 1.268564                | 3.762840 | -0.003669 |
| 6             | 6             | 0           | 2.691819                | 3.761399 | -0.003625 |
| 7             | 6             | 0           | 3.383936                | 4.945594 | -0.004809 |
| 8             | 1             | 0           | 4.469407                | 4.914393 | -0.004742 |
| 9             | 6             | 0           | 2.699446                | 6.188931 | -0.006099 |
| 10            | 6             | 0           | 1.265867                | 6.190381 | -0.006160 |
| 11            | 6             | 0           | 0.578853                | 4.948437 | -0.004913 |

|    |    |   |           |           |           |
|----|----|---|-----------|-----------|-----------|
| 12 | 1  | 0 | -0.506679 | 4.919420  | -0.004925 |
| 13 | 8  | 0 | 3.413655  | 2.583136  | -0.002401 |
| 14 | 8  | 0 | 0.544325  | 2.586054  | -0.002461 |
| 15 | 16 | 0 | 1.975300  | -1.051583 | 0.000999  |
| 16 | 6  | 0 | 3.386647  | 7.430775  | -0.007332 |
| 17 | 6  | 0 | 0.581197  | 7.433622  | -0.007461 |
| 18 | 6  | 0 | 1.277339  | 8.622173  | -0.008641 |
| 19 | 6  | 0 | 2.692925  | 8.620739  | -0.008574 |
| 20 | 1  | 0 | 4.474141  | 7.427472  | -0.007280 |
| 21 | 1  | 0 | -0.506302 | 7.432539  | -0.007511 |
| 22 | 6  | 0 | -0.697390 | -0.170723 | 0.000356  |
| 23 | 6  | 0 | -1.272356 | -1.424697 | 0.001523  |
| 24 | 16 | 0 | -1.975300 | 1.051584  | -0.000638 |
| 25 | 6  | 0 | -2.683261 | -1.423263 | 0.001477  |
| 26 | 8  | 0 | -0.544325 | -2.586054 | 0.002619  |
| 27 | 6  | 0 | -3.255680 | -0.168128 | 0.000273  |
| 28 | 8  | 0 | -3.413655 | -2.583136 | 0.002506  |
| 29 | 6  | 0 | -1.268564 | -3.762840 | 0.003749  |
| 30 | 6  | 0 | -2.691819 | -3.761399 | 0.003676  |
| 31 | 6  | 0 | -0.578853 | -4.948437 | 0.004942  |
| 32 | 6  | 0 | -3.383936 | -4.945594 | 0.004776  |
| 33 | 6  | 0 | -1.265867 | -6.190381 | 0.006105  |
| 34 | 1  | 0 | 0.506679  | -4.919420 | 0.004980  |
| 35 | 1  | 0 | -4.469407 | -4.914393 | 0.004686  |
| 36 | 6  | 0 | -2.699446 | -6.188931 | 0.006010  |
| 37 | 6  | 0 | -0.581197 | -7.433623 | 0.007355  |
| 38 | 6  | 0 | -3.386647 | -7.430775 | 0.007159  |
| 39 | 6  | 0 | -1.277339 | -8.622174 | 0.008456  |
| 40 | 1  | 0 | 0.506302  | -7.432539 | 0.007433  |
| 41 | 6  | 0 | -2.692925 | -8.620739 | 0.008353  |
| 42 | 1  | 0 | -4.474142 | -7.427473 | 0.007079  |
| 43 | 1  | 0 | 3.231198  | 9.564374  | -0.009512 |
| 44 | 1  | 0 | 0.740984  | 9.566900  | -0.009636 |
| 45 | 1  | 0 | -0.740984 | -9.566901 | 0.009414  |
| 46 | 1  | 0 | -3.231198 | -9.564375 | 0.009227  |
| 47 | -2 | 0 | 7.905439  | -0.007988 | 0.000139  |

-----  
**PNaphtDOS, P1d.**

| Center<br>Number | Atomic<br>Number | Atomic<br>Type | Coordinates (Angstroms) |          |           |
|------------------|------------------|----------------|-------------------------|----------|-----------|
|                  |                  |                | X                       | Y        | Z         |
| 1                | 6                | 0              | 3.356975                | 0.125213 | 0.000037  |
| 2                | 6                | 0              | 2.736714                | 1.354633 | -0.000069 |
| 3                | 6                | 0              | 1.324552                | 1.356003 | -0.000071 |
| 4                | 6                | 0              | 0.701922                | 0.127777 | 0.000031  |
| 5                | 6                | 0              | 1.322041                | 3.703628 | -0.000322 |
| 6                | 6                | 0              | 2.743815                | 3.702243 | -0.000319 |
| 7                | 6                | 0              | 3.437122                | 4.885735 | -0.000445 |
| 8                | 1                | 0              | 4.522439                | 4.850590 | -0.000444 |
| 9                | 6                | 0              | 2.752334                | 6.128903 | -0.000579 |
| 10               | 6                | 0              | 1.318315                | 6.130305 | -0.000581 |
| 11               | 6                | 0              | 0.631073                | 4.888489 | -0.000451 |
| 12               | 1                | 0              | -0.454312               | 4.855508 | -0.000453 |

|    |    |   |           |           |           |
|----|----|---|-----------|-----------|-----------|
| 13 | 8  | 0 | 3.460654  | 2.523561  | -0.000208 |
| 14 | 8  | 0 | 0.602894  | 2.526349  | -0.000213 |
| 15 | 6  | 0 | 3.439259  | 7.371156  | -0.000714 |
| 16 | 6  | 0 | 0.633840  | 7.373910  | -0.000718 |
| 17 | 6  | 0 | 1.329832  | 8.562408  | -0.000847 |
| 18 | 6  | 0 | 2.745609  | 8.561021  | -0.000844 |
| 19 | 1  | 0 | 4.526750  | 7.367086  | -0.000712 |
| 20 | 1  | 0 | -0.453657 | 7.371989  | -0.000721 |
| 21 | 6  | 0 | -0.701922 | -0.127777 | -0.000045 |
| 22 | 6  | 0 | -1.324552 | -1.356003 | 0.000062  |
| 23 | 6  | 0 | -2.736714 | -1.354633 | 0.000061  |
| 24 | 8  | 0 | -0.602894 | -2.526349 | 0.000206  |
| 25 | 6  | 0 | -3.356975 | -0.125213 | -0.000047 |
| 26 | 8  | 0 | -3.460654 | -2.523561 | 0.000203  |
| 27 | 6  | 0 | -1.322041 | -3.703628 | 0.000318  |
| 28 | 6  | 0 | -2.743815 | -3.702243 | 0.000316  |
| 29 | 6  | 0 | -0.631073 | -4.888489 | 0.000450  |
| 30 | 6  | 0 | -3.437122 | -4.885735 | 0.000446  |
| 31 | 6  | 0 | -1.318315 | -6.130305 | 0.000584  |
| 32 | 1  | 0 | 0.454312  | -4.855508 | 0.000452  |
| 33 | 1  | 0 | -4.522439 | -4.850590 | 0.000444  |
| 34 | 6  | 0 | -2.752334 | -6.128903 | 0.000582  |
| 35 | 6  | 0 | -0.633840 | -7.373910 | 0.000724  |
| 36 | 6  | 0 | -3.439259 | -7.371156 | 0.000721  |
| 37 | 6  | 0 | -1.329832 | -8.562408 | 0.000856  |
| 38 | 1  | 0 | 0.453657  | -7.371989 | 0.000726  |
| 39 | 6  | 0 | -2.745609 | -8.561021 | 0.000854  |
| 40 | 1  | 0 | -4.526750 | -7.367086 | 0.000720  |
| 41 | 34 | 0 | -2.028135 | 1.236527  | -0.000514 |
| 42 | 34 | 0 | 2.028135  | -1.236527 | 0.000499  |
| 43 | 1  | 0 | -3.284126 | -9.504611 | 0.000959  |
| 44 | 1  | 0 | -0.793171 | -9.507055 | 0.000963  |
| 45 | 1  | 0 | 3.284126  | 9.504611  | -0.000947 |
| 46 | 1  | 0 | 0.793171  | 9.507055  | -0.000952 |
| 47 | -2 | 0 | 8.117306  | -0.007786 | 0.000013  |

-----

## References

- <sup>1</sup> S. Roquet, P. Leriche, I. F. Perepichka, B. Jusselme, E. Levillain, P. Frère and J. Roncali, *J. Mater. Chem.* 2004, **14**, 1396.
- <sup>2</sup> I. F. Perepichka, S. Roquet, P. Leriche, J. M. Raimundo, P. Frère and J. Roncali, *Chem. Eur. J.* 2006, **12**, 2960.
- <sup>3</sup> N. G. Connelly and W. E. Geiger, *Chem. Rev.* 1996, **96**, 877.
